# Supplementary material for: Porous Cu nanosheets for efficient ammonia production via nitrate electroreduction
Source: Royal Society of Chemistry journal article supplement (doi:10.1039/d5qm00322a), 2025-01-01
Supplement: d5qm00322a1.pdf [file d5qm00322a1.pdf]

## **Electronic supplementary information**

### **Porous Cu nanosheets for efficient ammonia production via nitrate electroreduction**

Eman-Shaiba Thani,<sup>a</sup> Yi-Ting Yang,<sup>a</sup> Qiu-Yu Du,<sup>b</sup> Rou Yuan,<sup>a</sup> Yong-Qi Zhang,<sup>a</sup> Yu-Tong Yan,<sup>a</sup> Xuan Ai,<sup>\*b</sup> Yu Chen<sup>b</sup> and Shu-Ni Li<sup>\*a</sup>

<sup>a</sup> Key Laboratory of Macromolecular Science of Shaanxi Province, School of Chemistry and Chemical Engineering, Shaanxi Normal University, Xi'an 710062, PR China.

<sup>b</sup> School of Materials Science and Engineering, Shaanxi Normal University, Xi'an 710062, PR China.

\*Corresponding authors

E-mail: lishuni@snnu.edu.cn (S.-N. Li).

E-mail: aixuan@snnu.edu.cn (X. Ai).

## Experimental section

### Physical characterization

The chemical component, morphology, chemical state, crystallographic structure, surface area of electrocatalysts were characterized by scanning electron microscope (SEM, SU-8020), transmission electron microscopy (TEM, TECNAI G2 F20) with energy dispersive X-ray spectroscopy (EDX) accessory, X-ray diffraction (XRD, DX-2700), and X-ray photoelectron spectroscopy (XPS, Kratos Analytical Ltd.). The measurement of the concentration of  $\text{NH}_3$  was completed using previous reported methods, which were performed on ultraviolet-visible spectrophotometer (UV-vis, UV-2600).

### Electrochemical measurements

All electrochemical tests were performed at the CHI 760E electrochemical workstation using a three-electrode or two-electrode system. In the three-electrode system, the working electrode is a glassy carbon electrode, the reference electrode is a saturated calomel electrode (SCE), and the auxiliary electrode is a carbon rod. All potentials were about the reversible hydrogen electrode (RHE), where  $E_{\text{RHE}} = E_{\text{SCE}} + 0.242 \text{ V} + 0.0591 \text{ pH}$ . The ink was prepared by adding 4 mg of catalyst to a mixture solution of 1.6 mL of water, 0.4 mL of isopropanol, and 10  $\mu\text{L}$  of Nafion. 12  $\mu\text{L}$  of catalyst was uniformly coated on the working electrode and dried at room temperature. The catalyst loading on the working electrode was about  $0.3429 \text{ mg cm}^{-2}$ .

## The Faradaic efficiency of NO<sub>3</sub>RR and NH<sub>3</sub> yield

The chronoamperometry tests of NO<sub>3</sub>RR were performed under an H-type electrolytic cell, where the electrolyte was to be purged with Ar for 30 minutes prior to the test. The cathode and anode chambers were 40 mL of 0.5 M Na<sub>2</sub>SO<sub>4</sub> + 0.05 M NaNO<sub>3</sub> solution and 0.5 M Na<sub>2</sub>SO<sub>4</sub> solution, respectively.

The Faradaic efficiency for NH<sub>4</sub><sup>+</sup> production was defined as charge converted to NH<sub>4</sub><sup>+</sup> divided by the total charge passed through the electrodes during the electrolysis (Q), which was calculated according to the following formula:<sup>[1]</sup>

$$\text{Faradaic efficiency} = \frac{enF}{Q} \times 100\% \quad (1)$$

$e$  was the number of electrons involved in the reaction;  $n$  was the quantity of the formed NH<sub>4</sub><sup>+</sup>;  $F$  was the faraday constant (96,485 C mol<sup>-1</sup>).

The NH<sub>4</sub><sup>+</sup> yield was calculated by following formula: <sup>[2]</sup>

$$\text{Yield rate} = \frac{n}{mt} \quad (2)$$

where  $n$  was the quantity of the formed NH<sub>4</sub><sup>+</sup> and  $m$  and  $t$  were the electrocatalyst mass and the reduction reaction time, respectively.

The Faraday efficiency of NO<sub>2</sub><sup>-</sup> to NH<sub>3</sub> can be calculated by the following formula:

$$\text{FE}_{\text{NO}_2^-} = (2 \times F \times c_{\text{NO}_2^-} \times V) / (46 \times Q) \quad (3)$$

The NO<sub>2</sub><sup>-</sup> yield can be calculated by the following formula:

$$\text{Yield}_{\text{NO}_2^-} = (c_{\text{NO}_2^-} \times V) / (m \times t) \quad (4)$$

$c_{\text{NH}_3}$  is the mass concentration of NH<sub>3</sub> (aq),  $V$  is the volume of electrolyte in the cathode compartment (20 mL),  $t$  is the electrolytic time (3 h),  $F$  is the Faradaic constant (96485

C mol<sup>-1</sup>), Q is the total charge passing the electrode, m and t are the electrocatalyst mass and the reduction reaction time, respectively.

### **Determination of NH<sub>4</sub><sup>+</sup>-N**

Phenol hypochlorite method was used to detect the NH<sub>3</sub> concentration. [2] Firstly, the corresponding calibration curve was obtained by UV-vis curves for known concentration of NH<sub>4</sub><sup>+</sup> in 0.05 M Na<sub>2</sub>SO<sub>4</sub>. After running chronoamperometry test for 3 h, 500 µL were taken from the electrolyte and put it into the centrifuge tube and diluted to 5 mL with water. Then Stock reagents were added in solution and stand for 3 h. Finally, NH<sub>4</sub><sup>+</sup>-N concentration was calculated according to the UV-vis curve and calibration curve.

### **Determination of nitrite**

The concentration of NO<sub>2</sub><sup>-</sup> was detected by the N-(1-naphthyl) ethylenediamine spectrophotometry method. Take 1.0 mL electrolyte in a 50 mL volumetric bottle, dilute it with a little deionized water, then add 1.0 mL p-aminobenzene sulfonamide and mix well. After leaving for 2-8 min, add 1.0 mL N-(1-naphthyl) ethylenediamine dihydrochloride and mix well. Finally, after 10 min, the absorbance was measured by a UV-vis spectrophotometer at 540 nm wavelength. The concentration-absorbance curve was made using a series of standard sodium nitrite solutions.

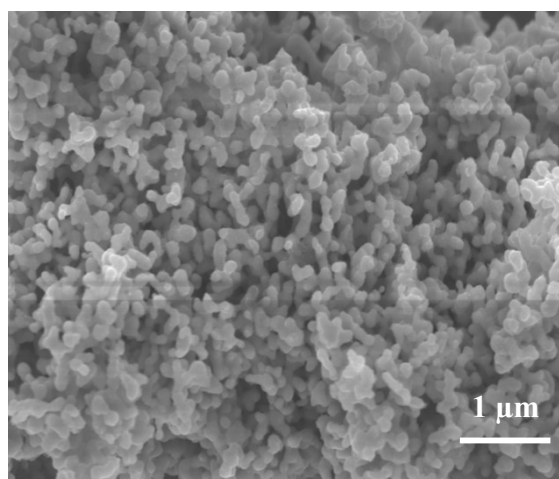

**Fig. S1.** SEM image of the Cu NPs.

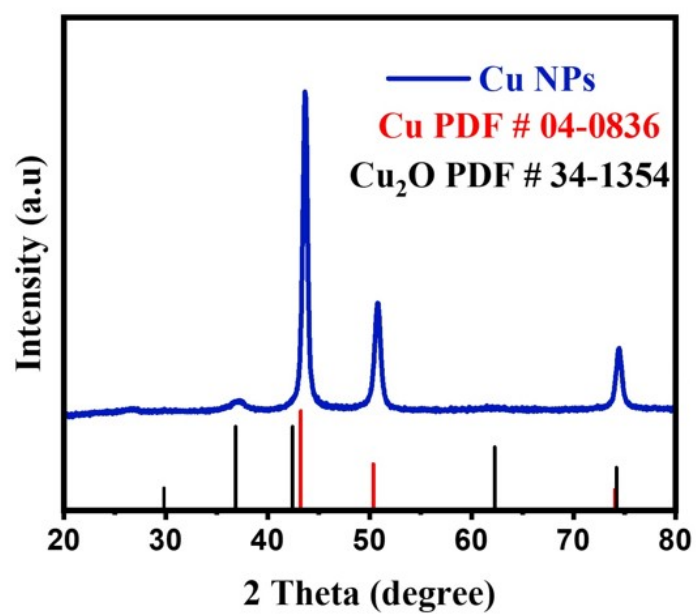

**Fig. S2.** XRD pattern of Cu NPs.

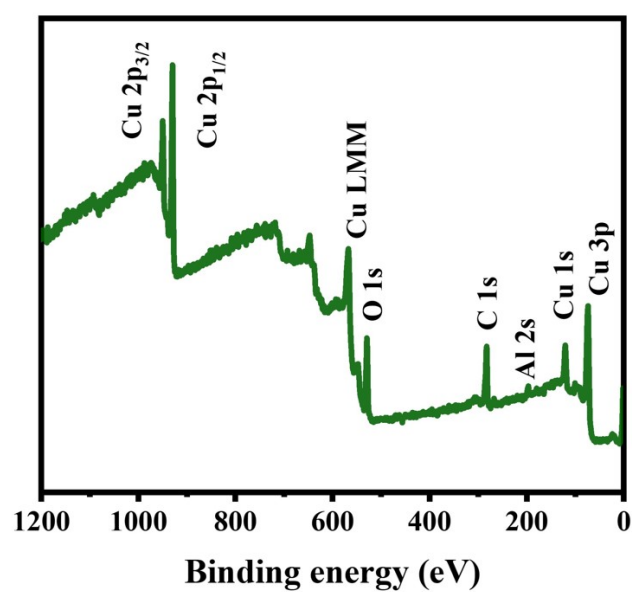

**Fig. S3.** XPS survey spectrum of Cu NPs.

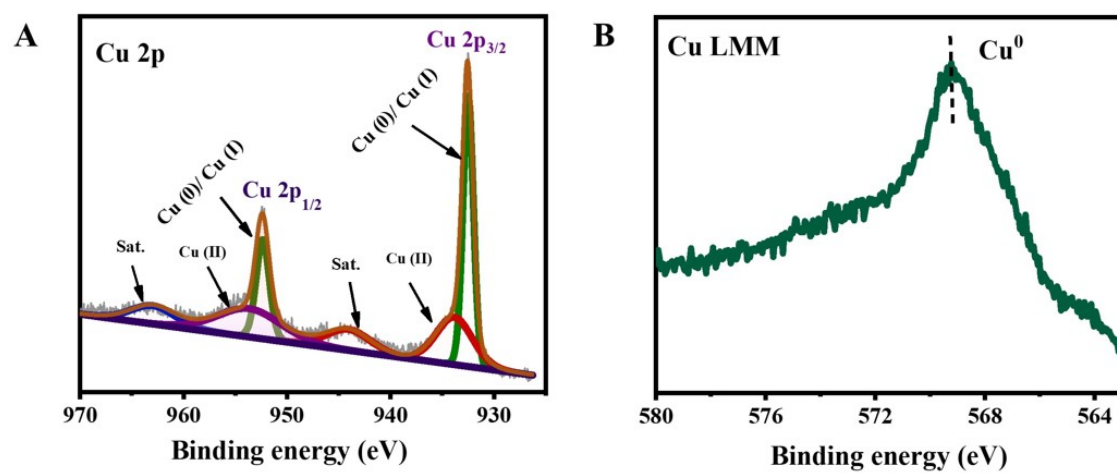

**Fig. S4.** (A) Cu 2p XPS spectra, (B) Cu LMM auger spectra of Cu NPs.

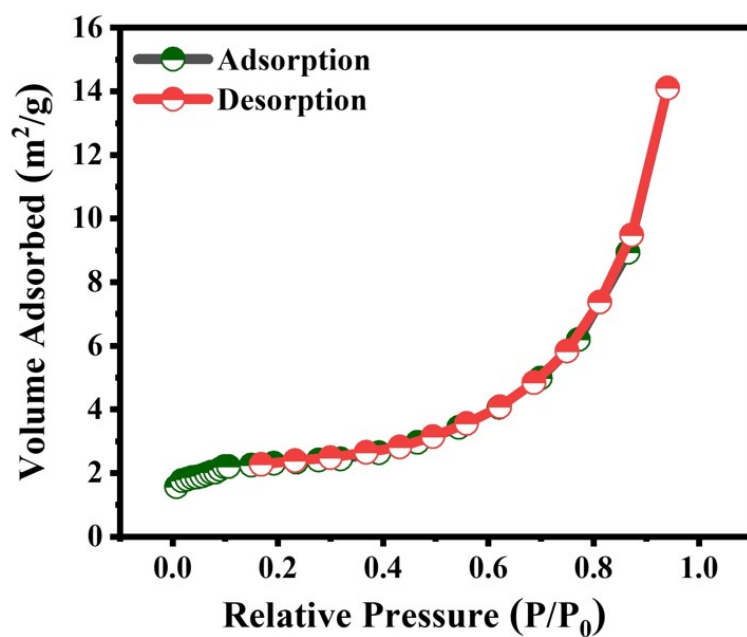

**Fig. S5.** Nitrogen adsorption-desorption isotherm curves of Cu NPs.

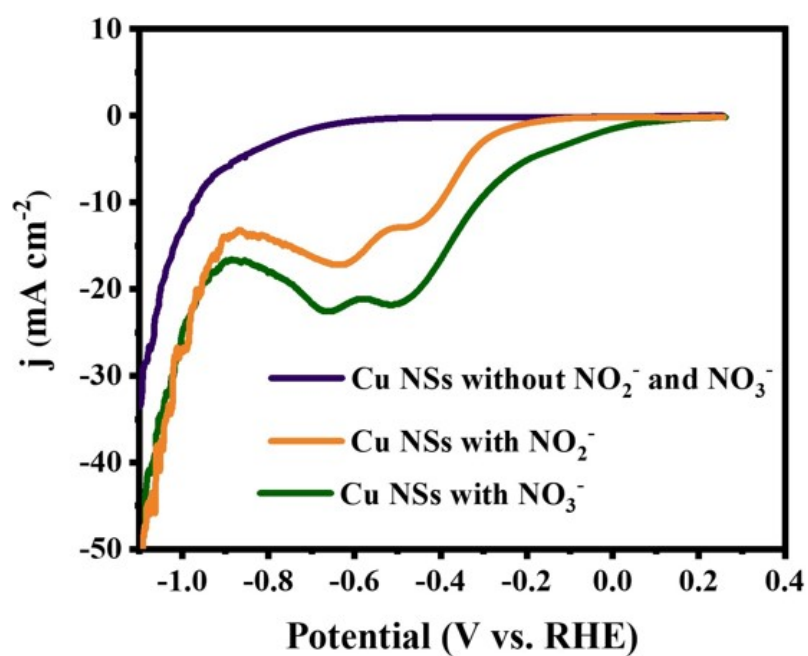

**Fig. S6.** LSV curves of Cu NSs in 0.5M Na<sub>2</sub>SO<sub>4</sub> with NO<sub>2</sub><sup>-</sup> and NO<sub>3</sub><sup>-</sup>.

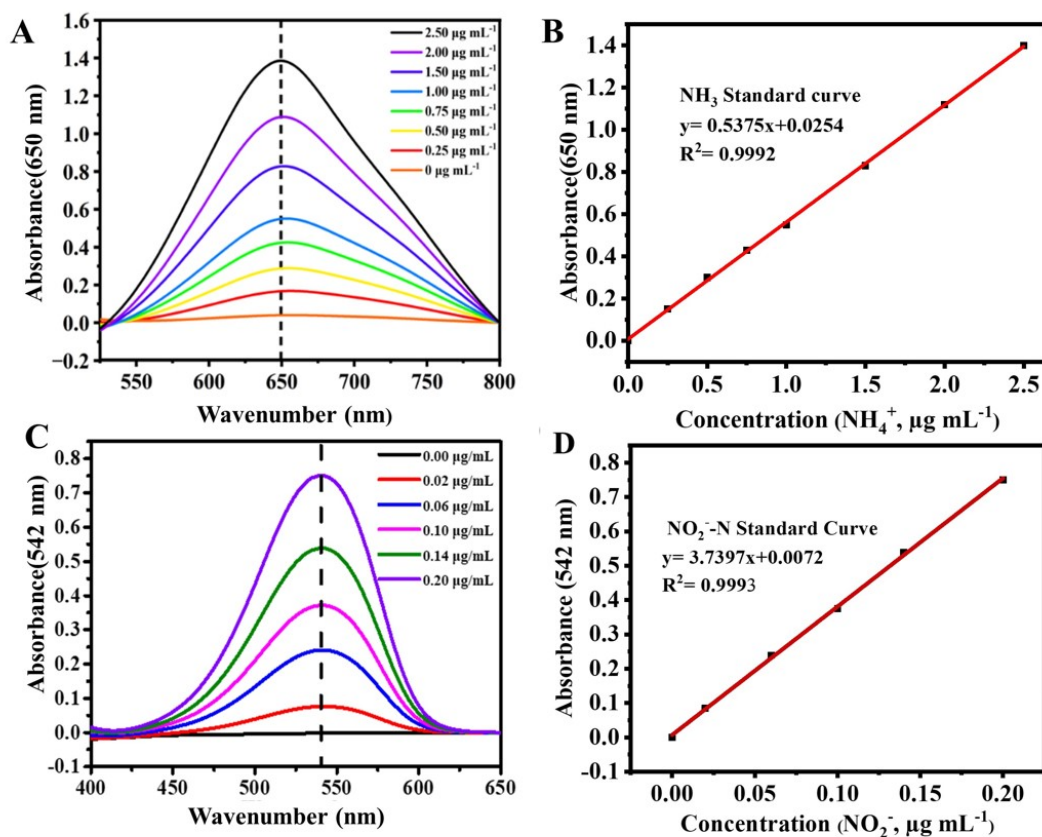

**Fig. S7.** (A) UV-vis curves of phenate assays after in darkness for 3 h at room temperature. (B) The calibration curve used for estimation of  $\text{NH}_3$  by  $\text{NH}_4^+$ -N ion concentration. (C) UV-vis adsorption curves and (D) calibration curves of  $\text{NO}_2^-$ .

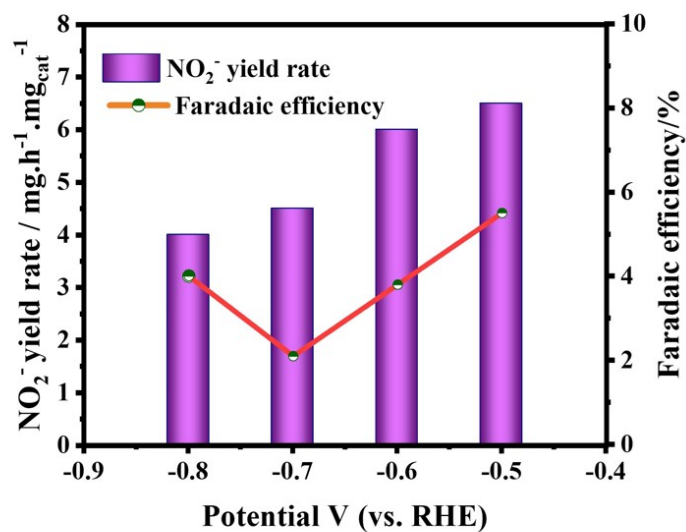

**Fig. S8.** The Faradaic efficiency and  $\text{NO}_2^-$  yield on Cu NSs at different potential.



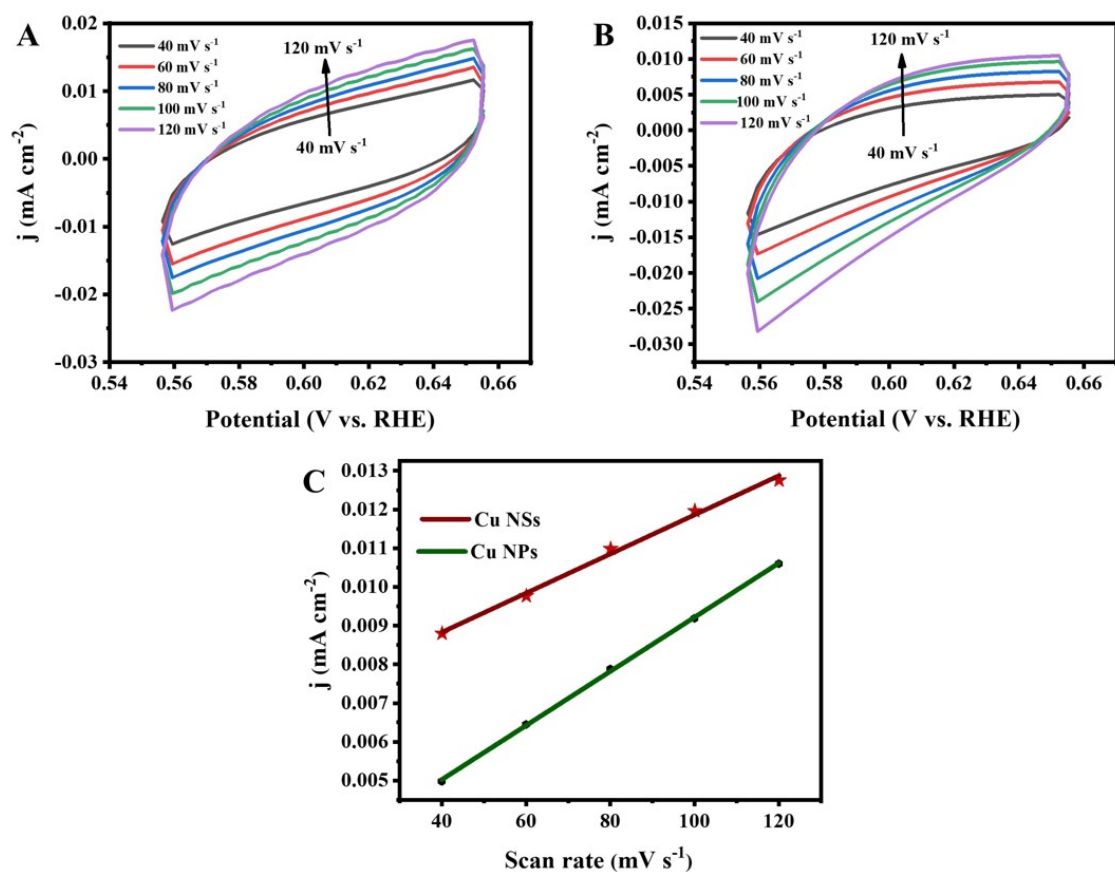

**Fig. S9.** CV curves of (A) Cu NSs (B) Cu NPs at different potential scanning rates in 0.5 M  $\text{Na}_2\text{SO}_4$  solution. C) Linear fitting of  $\Delta j$  of Cu NSs and Cu NPs ( $\Delta j = j_a - j_c$ ) vs. scan rates at -0.7 V vs. RHE.

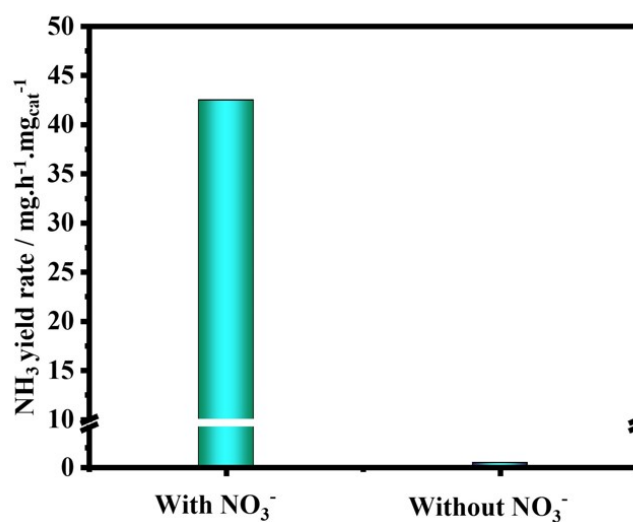

**Fig. S10.** The  $\text{NH}_3$  yield on Cu NSs in 0.5 M  $\text{Na}_2\text{SO}_4$  electrolyte with and without  $\text{NO}_3^-$ .

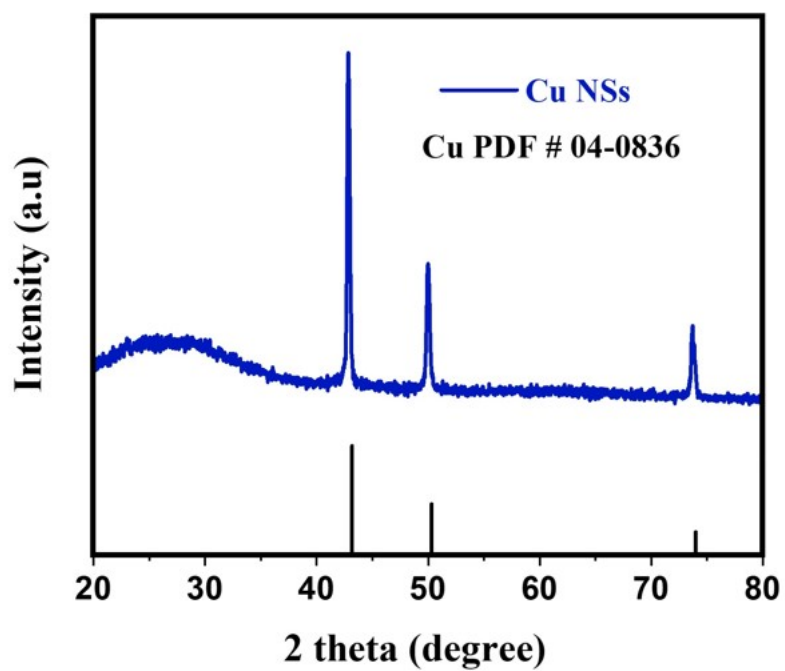

**Fig. S11.** XRD pattern of Cu NSs after chronoamperometry in 0.5 M Na<sub>2</sub>SO<sub>4</sub> with 50 mM NaNO<sub>3</sub> at -0.7 V potential.

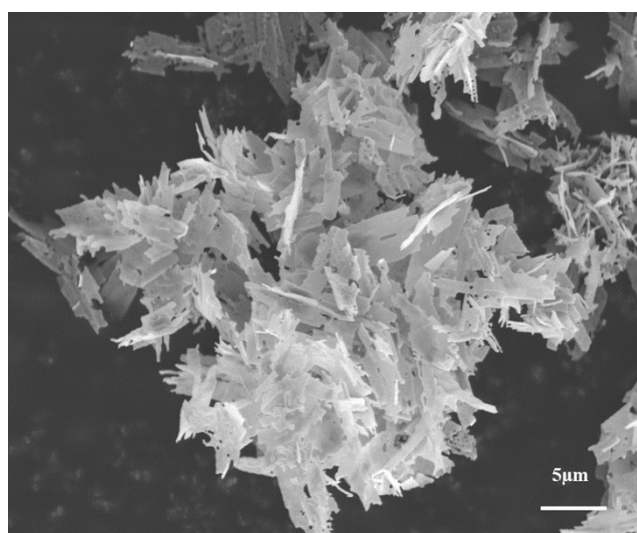

**Fig. S12.** SEM image of Cu NSs after chronoamperometry.

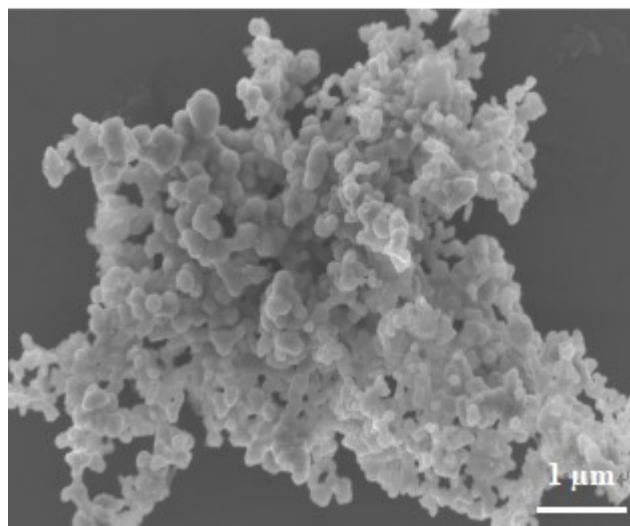

**Fig. S13.** SEM image of Cu NPs after chronoamperometry.

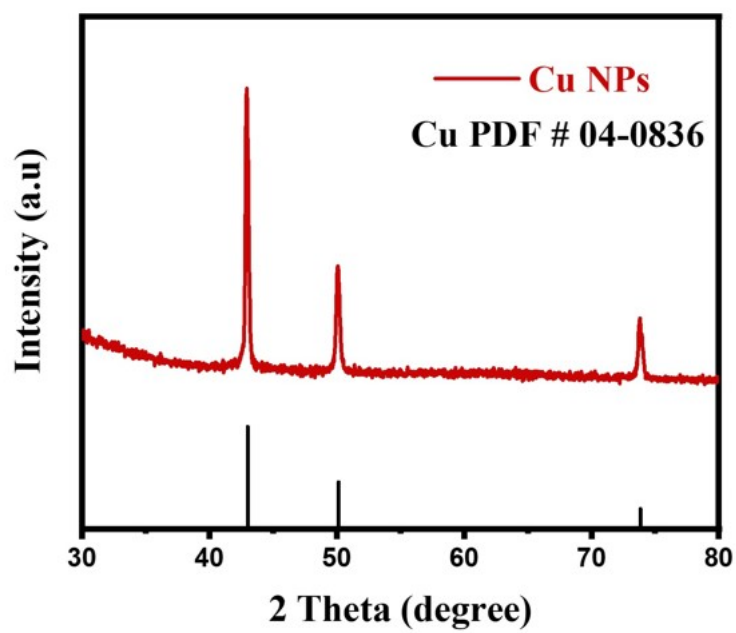

**Fig. S14.** XRD pattern of Cu NPs after chronoamperometry in 0.5 M Na<sub>2</sub>SO<sub>4</sub> with 50 mM NaNO<sub>3</sub> at -0.7 V potential.

**Table S1** Comparisons of the NO<sub>3</sub>RR Activity of Electrocatalysts.

| Electrocatalysts                               | Electrolyte                                                                                        | Potential | NH <sub>3</sub> yield                                             | FE (%) | Ref. (year)          |
|------------------------------------------------|----------------------------------------------------------------------------------------------------|-----------|-------------------------------------------------------------------|--------|----------------------|
| Cu Nanosheet                                   | 0.5 M Na <sub>2</sub> SO <sub>4</sub> + 50 mM NaNO <sub>3</sub>                                    | -0.70 V   | 42.5 mg h <sup>-1</sup> mg <sub>cat</sub> <sup>-1</sup>           | 97.0   | This work            |
| Co <sub>1</sub> -P/NPG                         | 0.5 M Na <sub>2</sub> SO <sub>4</sub> + 0.1 M KNO <sub>3</sub>                                     | -0.7 V    | 8.6 mg h <sup>-1</sup> mg <sub>cat</sub> <sup>-1</sup>            | 93.8   | 2024 <sup>[3]</sup>  |
| Cu <sub>x</sub> O/N-GDY                        | 0.1 M KOH + 0.1 M KNO <sub>3</sub>                                                                 | -0.5 V    | 340 μmol h <sup>-1</sup> mg <sub>cat</sub> <sup>-1</sup>          | 85     | 2024 <sup>[4]</sup>  |
| Cu/Cu <sub>2</sub> O/Pi                        | 1 M KOH + 0.1 M KNO <sub>3</sub>                                                                   | -0.5 V    | 8.19 mg h <sup>-1</sup> cm <sup>-1</sup>                          | 96.6   | 2024 <sup>[5]</sup>  |
| Fe/Cu                                          | 1 M KOH + 0.1 M KNO <sub>3</sub>                                                                   | -0.5 V    | 1.08 mmol h <sup>-1</sup> mg <sup>-1</sup>                        | 92.51  | 2023 <sup>[6]</sup>  |
| Cu-doped Fe <sub>3</sub> O <sub>4</sub> flakes | 0.1 M KOH + 0.1 M KNO <sub>3</sub>                                                                 | -0.6 V    | 179.55 ± 16.37 mg h <sup>-1</sup> mg <sub>cat</sub> <sup>-1</sup> | ~100   | 2023 <sup>[7]</sup>  |
| CFP-Cu <sub>1</sub> Ni <sub>1</sub>            | 0.5 mol·L <sup>-1</sup> Na <sub>2</sub> SO <sub>4</sub> + 0.1 mol·L <sup>-1</sup> KNO <sub>3</sub> | -0.22 V   | 2550 μmol·h <sup>-1</sup> ·mg <sub>cat</sub> <sup>-1</sup>        | 95.7   | 2023 <sup>[8]</sup>  |
| Ru@C <sub>3</sub> N <sub>4</sub> /Cu NWs       | 0.5 m Na <sub>2</sub> SO <sub>4</sub> + 200 ppm NO <sub>3</sub> <sup>-</sup>                       | -0.9 V    | 0.249 mmol h <sup>-1</sup> cm <sup>-1</sup>                       | 91.3   | 2023 <sup>[9]</sup>  |
| Cu <sub>2</sub> O/Cu (OH) <sub>2</sub>         | 0.1 M KOH + 500 ppm NO <sub>3</sub> <sup>-</sup>                                                   | -0.6 V    | 1.63 mg h <sup>-1</sup> mg <sub>cat</sub> <sup>-1</sup>           | 76.95  | 2024 <sup>[10]</sup> |
| Cu/Cu <sub>2+1</sub> O NSA                     | 0.5 M Na <sub>2</sub> SO <sub>4</sub> + 200 mg L <sup>-1</sup> NO <sub>3</sub> <sup>-</sup>        | -1.5 V    | 0.2634 mmol h <sup>-1</sup> cm <sup>-2</sup>                      | 88.0   | 2024 <sup>[11]</sup> |
| Cu MNC                                         | 50 Mm Na <sub>2</sub> SO <sub>4</sub> + 100 mg L <sup>-1</sup> NaNO <sub>3</sub>                   | -0.64 V   | 5466 mmol g <sub>Cu</sub> <sup>-1</sup> h <sup>-1</sup>           | 65.3   | 2022 <sup>[12]</sup> |
| Cu <sub>2</sub> O h-NCs                        | 0.5 M Na <sub>2</sub> SO <sub>4</sub> + 0.05 M NaNO <sub>3</sub>                                   | -0.85 V   | 56.2 mg h <sup>-1</sup> mg <sub>cat</sub> <sup>-1</sup>           | 92.9   | 2022 <sup>[13]</sup> |
| Cu <sub>2</sub> O                              | 0.5 M Na <sub>2</sub> SO <sub>4</sub> + 5.0 mM NaNO <sub>3</sub>                                   | -0.8 V    | N/A                                                               | 92.28  | 2022 <sup>[14]</sup> |
| Rh@Cu                                          | 0.1 M Na <sub>2</sub> SO <sub>4</sub> + 0.1 M NaNO <sub>3</sub>                                    | -0.2 V    | 21.59 mg cm <sup>-2</sup> h <sup>-1</sup>                         | 93     | 2022 <sup>[15]</sup> |

## Reference:

- (1) Y. Wang, W. Zhou, R. Jia, Y. Yu and B. Zhang, Unveiling the Activity Origin of a Copper-based Electrocatalyst for Selective Nitrate Reduction to Ammonia, *Angew. Chem. Int. Ed.*, 2020, **59**, 5350-5354.
- (2) J. Zhu, Q. Xue, Y. Xue, Y. Ding, F. Li and P. Jin, Iridium Nanotubes as Bifunctional Electrocatalysts for Oxygen Evolution and Nitrate Reduction Reactions, *ACS. Appl. Mater. Interfaces.*, 2020, **12**, 14064-14070.
- (3) J. Ni, J. Yan, F. Li, H. Qi, Q. Xu and C. Su, Atomic Co-P Catalytic Pair Drives Efficient Electrochemical Nitrate Reduction to Ammonia, *Adv. Energy Mater.*, 2024, **14**, 2400065.
- (4) J. Li, R. Valenza and S. Haussener, In Situ Synthesis of  $\text{Cu}_x\text{O/N}$  Doped Graphdiyne with Pyridine N Configuration for Ammonia Production via Nitrate Reduction, *Small*, 2024, **20**, 2310467.
- (5) W. Luo, Z. Guo, L. Ye, S. Wu, Y. Jiang and P. Xu, Electrical-Driven Directed-Evolution of Copper Nanowires Catalysts for Efficient Nitrate Reduction to Ammonia, *Small*, 2024, **20**, 2311336.
- (6) S. Zhang, J. Wu, M. Zheng, X. Jin, Z. Shen and Z. Li, Fe/Cu Diatomic Catalysts for Electrochemical Nitrate Reduction to Ammonia, *Nat. Commun.*, 2023, **14**, 3634.
- (7) J. Wang, Y. Wang, C. Cai, Y. Liu, D. Wu and M. Wang, Cu-Doped Iron Oxide for the Efficient Electrocatalytic Nitrate Reduction Reaction, *Nano Letters.*, 2023, **23**, 1897-1903.
- (8) Z. Zhang, Y. Liu, X. Su, Z. Zhao, Z. Mo and C. Wang, Electro-Triggered Joule

- Heating Method to Synthesize Single-Phase CuNi Nano-Alloy Catalyst for Efficient Electrocatalytic Nitrate Reduction Toward Ammonia, *Nano Res.*, 2023, **16**, 6632-6641.
- (9) Y. Zheng, M. Qin, X. Yu, H. Yao, W. Zhang and G. Xie, Constructing Ru@C<sub>3</sub>N<sub>4</sub>/Cu Tandem Electrocatalyst with Dual-Active Sites for Enhanced Nitrate Electroreduction to Ammonia, *Small*, 2023, **19**, 2302266.
- (10) N. Roy, P. C. Mandal, N. D. Sherpa, H. Barma and B. Adhikary, Electrochemical Nitrate Reduction to NH<sub>3</sub> by Faceted Cu<sub>2</sub>O Nanostructures in Acidic Medium, *New. J. Chem.*, 2024, **48**, 20384-20398
- (11) C. Sun, Y. Xiao, X. Liu, J. Hu, Q. Zhao and Z. Yin, Three-Dimensional Porous Cu/Cu<sub>2+1</sub>O Nanosheet Arrays Promote Electrochemical Nitrate-to-Ammonia Conversion, *Inorg. Chem.*, 2024, **63**, 11852-11859.
- (12) Y. Xue, Q. Yu, Q. Ma, Y. Chen, C. Zhang and W. Teng, Electrocatalytic Hydrogenation Boosts Reduction of Nitrate to Ammonia Over Single-Atom Cu with Cu(I)-N<sub>3</sub>C<sub>1</sub> Sites, *Environ. Sci. Technol.*, 2022, **56**, 14797-14807.
- (13) X. Wang, Z. Wang, Q. Hong, Z. Zhang, F. Shi and D. Li, Oxygen-Vacancy-Rich Cu<sub>2</sub>O Hollow Nanocubes for Nitrate Electroreduction Reaction to Ammonia in a Neutral Electrolyte, *Inorg Chem.*, 2022, **61**, 15678-15685.
- (14) C. Wang, F. Ye, J. Shen, K. Xue, Y. Zhu and C. Li, In Situ Loading of Cu<sub>2</sub>O Active Sites on Island-Like Copper for Efficient Electrochemical Reduction of Nitrate to Ammonia, *ACS Appl. Mater. Interfaces.*, 2022, **14**, 6680-6688.
- (15) H. Liu, X. Lang, C. Zhu, J. Timoshenko, M. Ruscher and L. Bai, Efficient Electrochemical Nitrate Reduction to Ammonia with Copper-Supported Rhodium

Cluster and S-Atom Catalysts, *Angew. Chem. Int. Ed.*, 2022, **61**, e202202556.
